# Supplementary material
Source: publisher site journal article supplement (https://www.dovepress.com/article/212401)
Supplement: Supplementary file 1 [file get_supplementary_file.php]

**Supplementary Table 1: Geographic Characteristics of the Overall Sample and the Sample, Stratified by Race**

|  | Overall  (n = 10841) | Black  (n = 1420) | White  (n = 7282) | Hispanic  (n =1708) | Asian  (n = 346) | Other  (n =96) | p  value |
| --- | --- | --- | --- | --- | --- | --- | --- |
| Shortest distance from any ACC in miles, Median (IQR) | 50.1  (20.7-78.2) | 39.4  (14.1-71.4) | 56.9  (26.6-85.7) | 16.3  (8.2-60.6) | 54.3  (20.9-74.7) | 35.9  (16.6-73) | <0.001 |
| Distance from ACC, n (%)  ≤30 miles  31-60 miles  61-90 miles  91-120 miles  121-180 miles  181-240 miles  241-300 miles  >300 miles | 4059 (37.4)  2205 (20.3)  2570 (23.7)  1224 (11.3)  274 (2.5)  149 (1.4)  279 (2.6)  81 (0.8) | 648 (45.8)  190 (13.4)  370 (26.1)  95 (6.7)  52 (3.7)  13 (0.9)  43 (3)  5 (0.4) | 2132 (29.3)  1756 (24.1)  1750 (24)  1020 (14)  209 (2.9)  125 (1.7)  217 (3)  70 (1) | 1109 (65)  179 (10.5)  319 (18.7)  78 (4.6)  7 (0.4)  4 (0.2)  7 (0.4)  2 (0.1) | 126 (36.5)  65 (18.8)  108 (31.3)  22 (6.4)  4(1.2)  4 (1.2)  12 (3.5)  4 (1.2) | 44 (45.8)  15 (15.6)  23 (24)  9 (9.4)  2 (2.1)  3 (3.1)  0  0 | <0.001 |
| Shortest distance from liver transplant program in miles, Median (IQR) | 23.3  (10.1-46.9) | 14.3  (7.4-36) | 29.7  (14.4-56) | 10.6  (6.6-21.4) | 15.2  (8.3-36.4) | 18.3  (10.6-39.5) | <0.001 |
| Distance from Transplant Center, n (%)  ≤30 miles  31-60 miles  61-90 miles  91-120 miles  121-180 miles  181-240 miles  241-300 miles  >300 miles | 6514 (60.1)  2386 (22)  848 (7.8)  398 (3.7)  185 (1.7)  150 (1.4)  257 (2.4)  103 (1) | 1021 (72.1)  196 (13.8)  48 (3.4)  46 (3.3)  44 (3.1)  13 (0.9)  38 (2.7)  10 (0.7) | 3765 (51.7)  1920 (26.4)  733 (10.1)  318 (4.4)  130 (1.8)  126 (1.7)  201 (2.8)  86 (1.2) | 1419 (83.2)  186 (10.9)  52 (3.1)  28 (1.6)  7 (0.4)  4 (0.2)  7 (0.4)  2 (0.1) | 242 (70.1)  66 (19.1)  11 (3.2)  4 (1.2)  2 (0.6)  4 (1.2)  11 (3.2)  5 (1.5) | 67 (69.8)  19 (18.8)  4 (4.2)  2 (2.1)  2 (2.1)  3 (3.1)  0  0 | <0.001 |
| Type of census tract, n (%)  Rural  Urban  Mixed | 293 (2.8)  6827 (64.7)  3440 (32.6) | 25 (1.8)  1084 (77.2)  295 (21) | 255 (3.6)  4072 (57.7)  2731 (38.7) | 8 (0.5)  1353 (81)  309 (18.5) | 4 (1.2)  255 (75.9)  77 (22.9) | 1 (1.1)  63 (68.5)  28 (30.4) | <0.001 |

Abbreviations: ACC = Academic cancer center, IQR = Interquartile range.
